# Supplementary material for: Polyploid giant cancer cells, EZH2 and Myc upregulation in mammary epithelial cells infected with high-risk human cytomegalovirus
Source: PubMed Central journal article supplement — eBioMedicine. 2022 May 18;80:104056. doi: 10.1016/j.ebiom.2022.104056 (PMC9121245; doi:10.1016/j.ebiom.2022.104056), 2022-05-18
Supplement: mmc2.pdf [file mmc2.pdf]

Suppl. table 1.

| <b>Strain</b> | <b>Sex</b> | <b>Age</b> | <b>Medical condition</b>   | <b>Isolated from</b>                   | <b>Viruria</b> | <b>Viremia</b> |
|---------------|------------|------------|----------------------------|----------------------------------------|----------------|----------------|
| <b>DB</b>     | Female     | 30         | Pregnant women             | Cervical swab                          | NA             | NA             |
| <b>BL</b>     | Male       | 71         | Kidney transplantation     | Urine<br>10 pfu/ml*                    | 3.7 log/ml     | Negative       |
| <b>KM</b>     | Female     | 2          | HCMV congenital infection? | Urine<br>< 5 pfu/ml*                   | yes            | 4.9 log/ml     |
| <b>FS</b>     | Female     | 4          | HCMV congenital infection? | Bronchoalveolar lavage<br>< 10 pfu/ml* | NA             | Negative       |

\*pfu/ml in culture

**Suppl. table 2.**

| <b>Target</b>             | <b>Forward primer</b>           | <b>Reverse primer</b>             |
|---------------------------|---------------------------------|-----------------------------------|
| IE1                       | 5'-CGACGTTCTGCAGACTATG-3'       | 5'-TCCTCGGTCACTTGTTCAAA-3'        |
| lncRNA4.9                 | 5'-CCCCCAATCTTGGGCG-3'          | 3'-GTTCGAATCGAGCTTA-3'            |
| Oct4                      | 5'-TGGAGAAGGAGAAGCTGGAGCAAAA-3' | 5'-GGCAGAGGTCGTTTGGCTGAATAGACC-3' |
| SSEA-4<br>synthase        | 5'-TGGACGGGCACAACCTTCATC-3'     | 5'-GGGCAGGTTCTTGGCACTCT-3'        |
| Nanog                     | 5'-TCCTCTCTTCTCTATACTAAC-3'     | 5'-CCCACAATCACAGGCATAG-3'         |
| Tra-1-60<br>(Podocalyxin) | 5'-CCAGCATCCAGTGTCACCAT-3'      | 5'-AGCCACGGTAGTGTTGACTG-3'        |
| SOX2                      | 5'-GGGAAATGGAGGGGTGCAAAGAGG-3'  | 5'-TTGCGTGAGTGTGGATGGGATTGGTG-3'  |
| $\beta$ -globin           | 5'-TCCCCTCTACCCCTACTTTCTA-3'    | 5'-TGCCTGGACTAATCTGCAAGAG-3'      |
| MIEP Enh                  | 5'-CGTCAATGGGTGGAGTAT-3'        | 5'-AGGTCATGTACTGGGCATAA-3'        |
| EZH2                      | 5'-TCGTGCCCTTGTGTGATAGC-3'      | 5'-TCTCGGACAGCCAGGTAGC-3'         |
| Myc                       | 5'-ACACCCTTCTCCCTTCG-3'         | 5'-CCGCTCCACATACAGTCC-3'          |
| GAPDH                     | 5'-CCCCTCTTCAAGGCCTCTAC-3'      | 5'-CGACCACTTTGTCAAGCTCA-3'        |

Supplementary table 3.

| <b>Target</b>    | <b>Reference</b> | <b>Manufacturer</b>                           | <b>Use</b>                                   |
|------------------|------------------|-----------------------------------------------|----------------------------------------------|
| EZH2             | 39875            | Active Motif, Carlsbad, CA, USA               | Microscopy, Western blotting, Flow cytometry |
| SUZ12            | 39357            | Active Motif, Carlsbad, CA, USA               | Microscopy, Western blotting, Flow cytometry |
| Myc              | 06-549           | Upstate, Lake Placid, NY, USA                 | Microscopy, Western blotting, Flow cytometry |
| pp65             | SC-58116         | Santa Cruz Biotechnology, Santa Cruz, CA, USA | Microscopy                                   |
| HCMV late Ag     | 11-005           | BioMérieux, Craaponne, France                 | Microscopy                                   |
| Oct4             | ab19857          | Abcam, Cambridge, UK                          | Flow cytometry                               |
| SSEA-4           | ab16287          | Abcam, Cambridge, UK                          | Flow cytometry                               |
| Nanog            | ab21624          | Abcam, Cambridge, UK                          | Flow cytometry                               |
| Tra-1-60         | ab16288          | Abcam, Cambridge, UK                          | Flow cytometry                               |
| SOX2             | ab97959          | Abcam, Cambridge, UK                          | Flow cytometry                               |
| Ki67 Ag          | 556026           | BD Biosciences Franklin Lakes, NJ, USA        | Flow cytometry                               |
| Akt              | SC-81434         | Santa Cruz Biotechnology, Santa Cruz, CA, USA | Flow cytometry                               |
| pAkt             | 560378           | BD Biosciences Franklin Lakes, NJ, USA        | Flow cytometry                               |
| STAT3            | SC-8019          | Santa Cruz Biotechnology, Santa Cruz, CA, USA | Flow cytometry                               |
| pSTAT3           | 558085           | BD Biosciences Franklin Lakes, NJ, USA        | Flow cytometry                               |
| EpCAM            | 347197           | BD Biosciences Franklin Lakes, NJ, USA        | Flow cytometry                               |
| CD49f            | 555735           | BD Biosciences Franklin Lakes, NJ, USA        | Flow cytometry                               |
| vimentin         | SC-6260          | Santa Cruz Biotechnology, Santa Cruz, CA, USA | Flow cytometry                               |
| E-cadherin       | SC-7870          | Santa Cruz Biotechnology, Santa Cruz, CA, USA | Flow cytometry                               |
| CD24             | 555428           | BD Biosciences Franklin Lakes, NJ, USA        | Flow cytometry                               |
| CD44             | 555478           | BD Biosciences Franklin Lakes, NJ, USA        | Flow cytometry                               |
| Anti-mice FITC   | 553443           | BD Biosciences Franklin Lakes, NJ, USA        | Flow cytometry                               |
| Anti-rabbit FITC | ab-6717          | Abcam, Cambridge, UK                          | Flow cytometry                               |
| Mice IgG PE      | 550617           | BD Biosciences Franklin Lakes, NJ, USA        | Flow cytometry                               |
| H3K27me3         | 9733             | Cell Signaling Technologies, Danvers, MA, USA | ChIP assay                                   |
| H3K4me3          | ab8580           | Abcam, Cambridge, UK                          | ChIP assay                                   |
| Total anti-H3    | ab1791           | Abcam, Cambridge, UK                          | ChIP assay                                   |

Suppl. Table 4.

| N°          | Patient Data                          |                 |                       |           | Histological Data  |                 |                  |     |             |                                                                                                                                                                |
|-------------|---------------------------------------|-----------------|-----------------------|-----------|--------------------|-----------------|------------------|-----|-------------|----------------------------------------------------------------------------------------------------------------------------------------------------------------|
|             | Patient age at diagnosis time (years) | Treatment       | Survival time (years) | Histotype | Elston Ellis grade | Vascular emboli | BC subtype       | TNM | PGCC number | IHC analysis                                                                                                                                                   |
| <b>B544</b> | 74                                    | 4 AC<br>9 taxol | 10                    | Ductal    | III<br>(3,3,3)     | Yes             | ER-PGR-<br>HER2- | ND  | 5           | Chromogranin A negative ;<br>synaptophysine negative ; rare immunoreactive cells                                                                               |
| <b>B693</b> | 85                                    | rx              | 3                     | Ductal    | III<br>(3,3,3)     | Yes             | ER-PGR-<br>HER2- | ND  | 4           | CK20- TTF1-CD20-<br>P63-<br>EGFR-<br>CK5/6-<br>Chromogranin A negative ;<br>synaptophysine negative<br>No myoepithelial cells in the vicinity of tumoral cells |

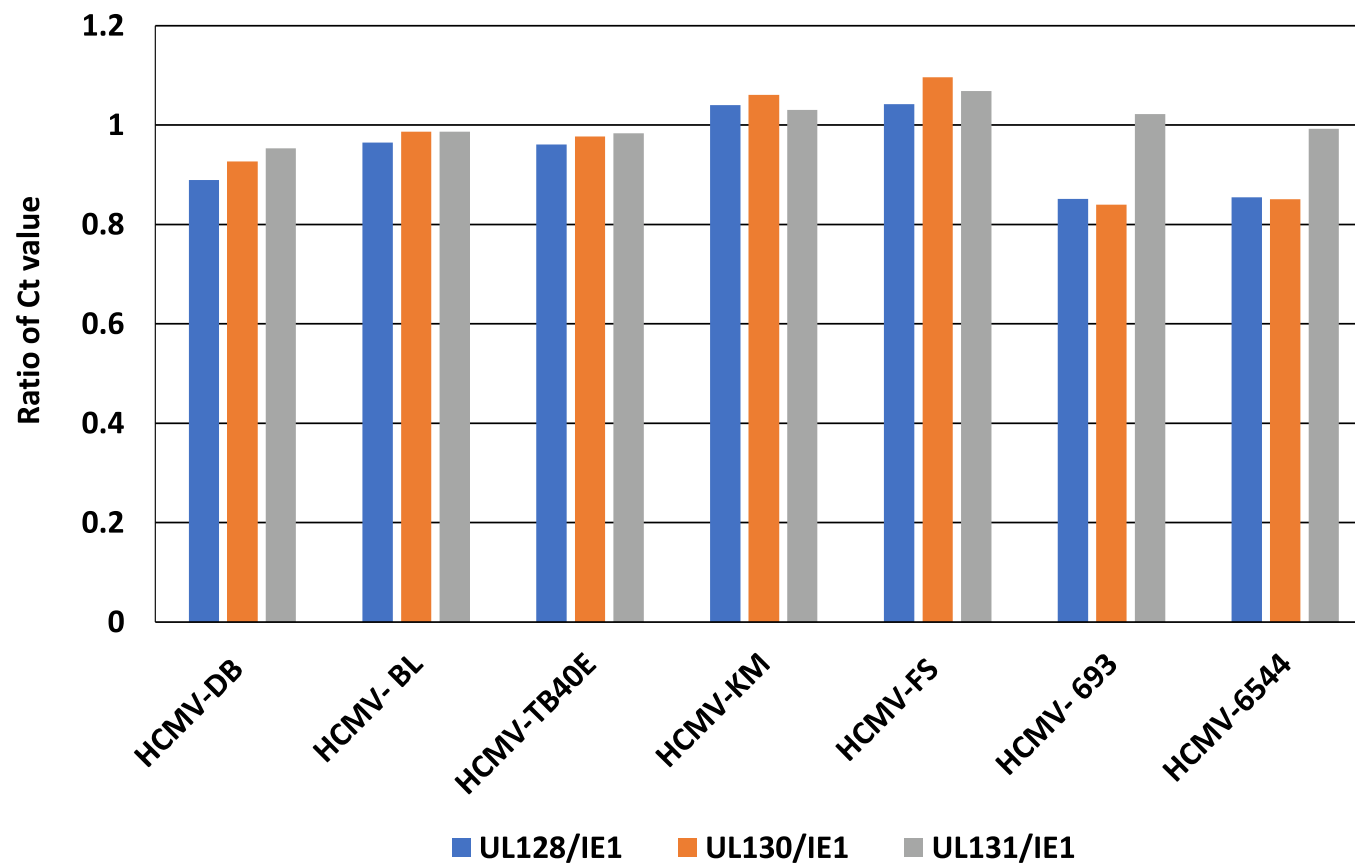

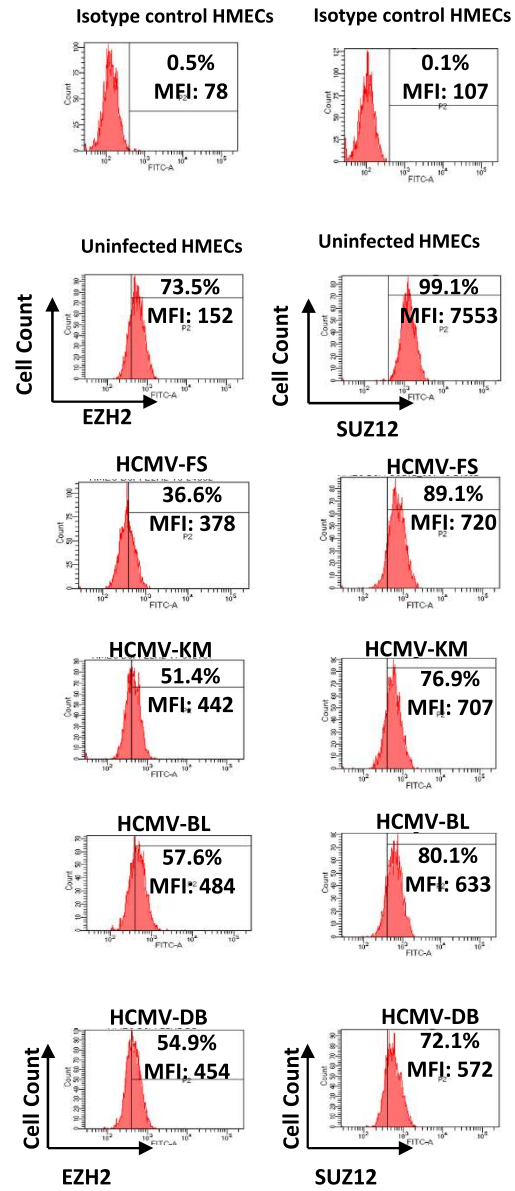

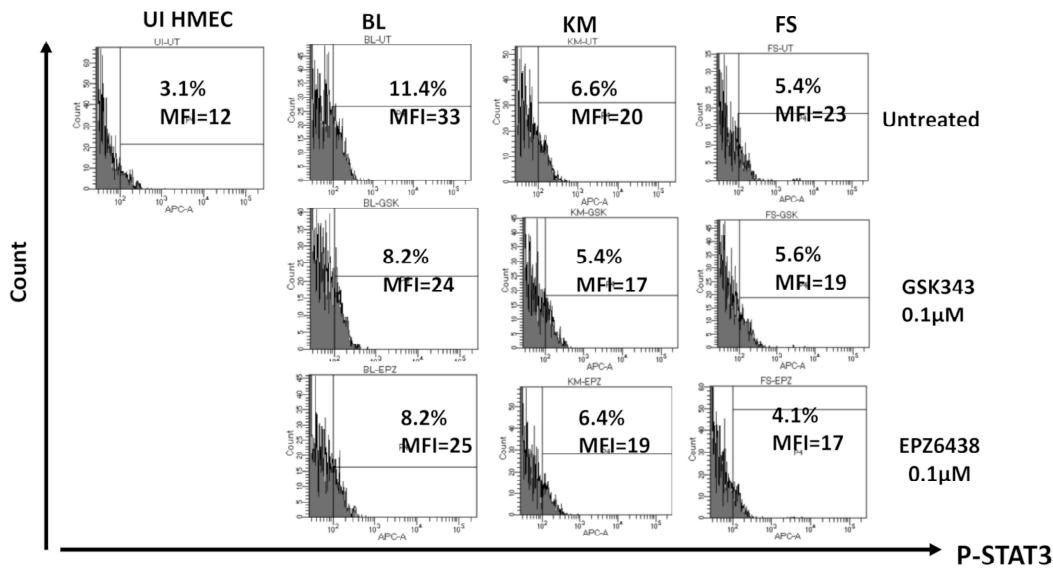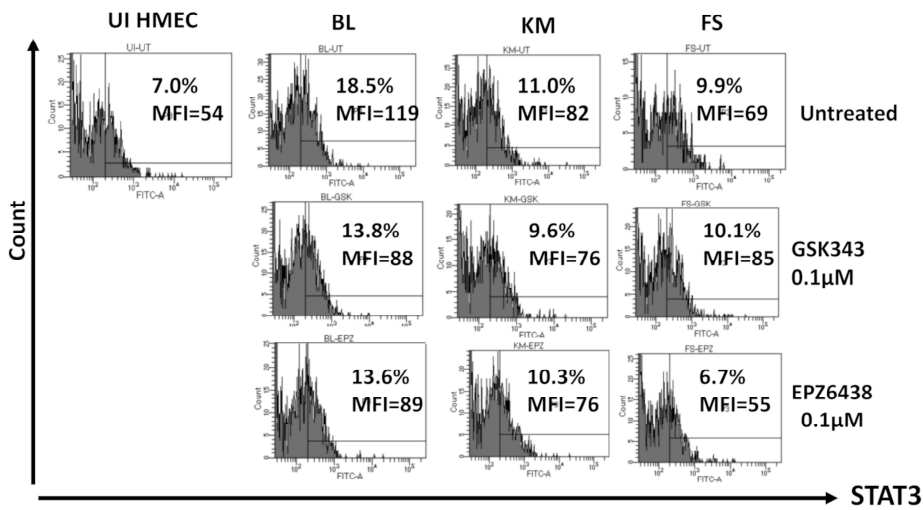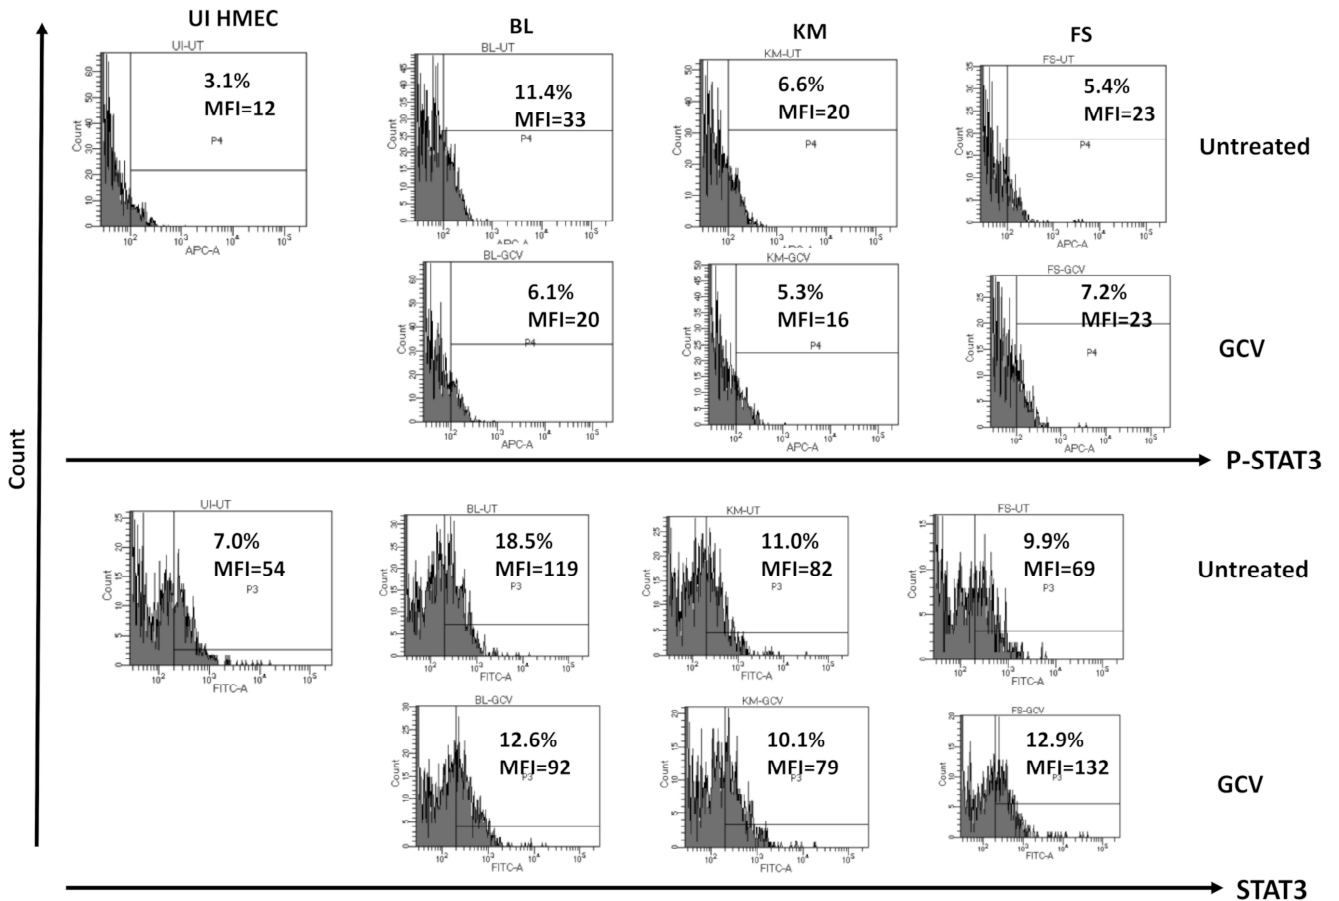

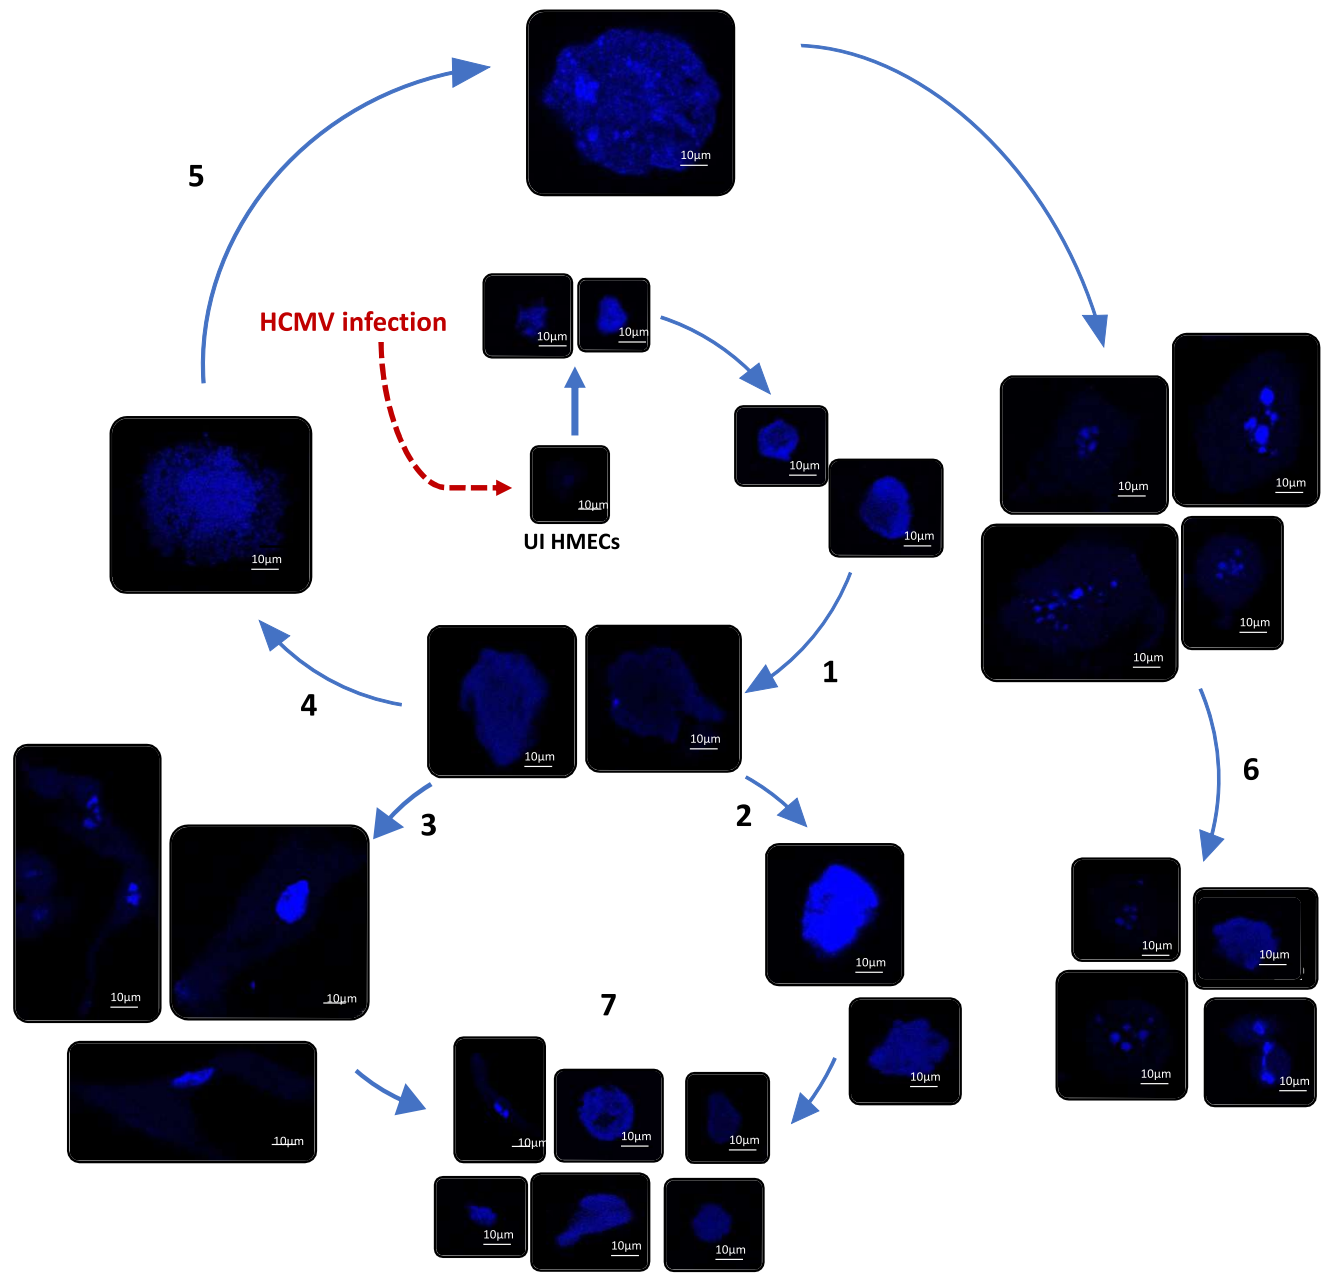

Suppl Figure 4



**a**

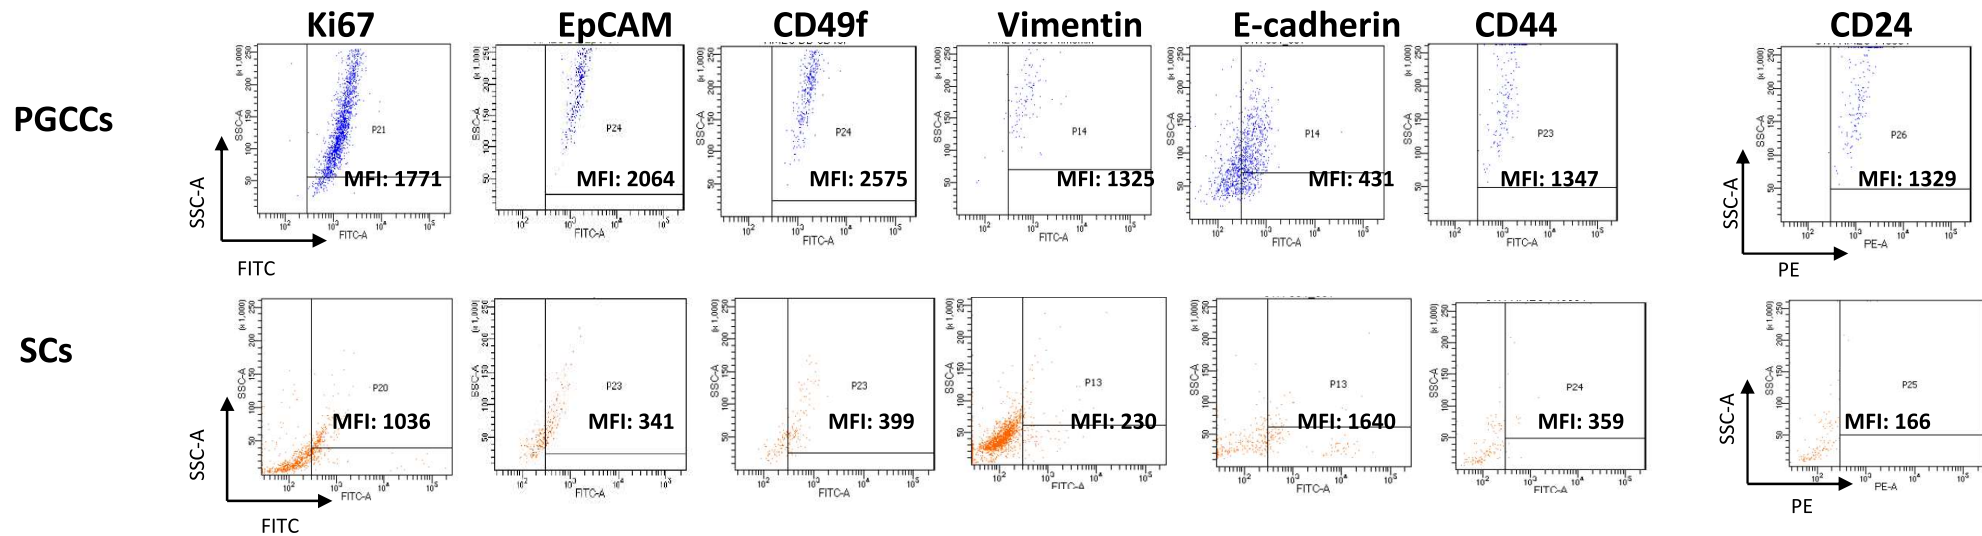

**b**

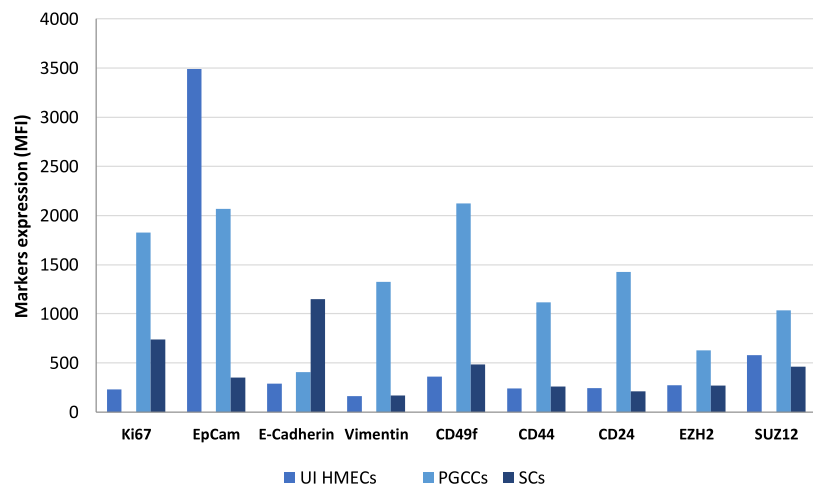

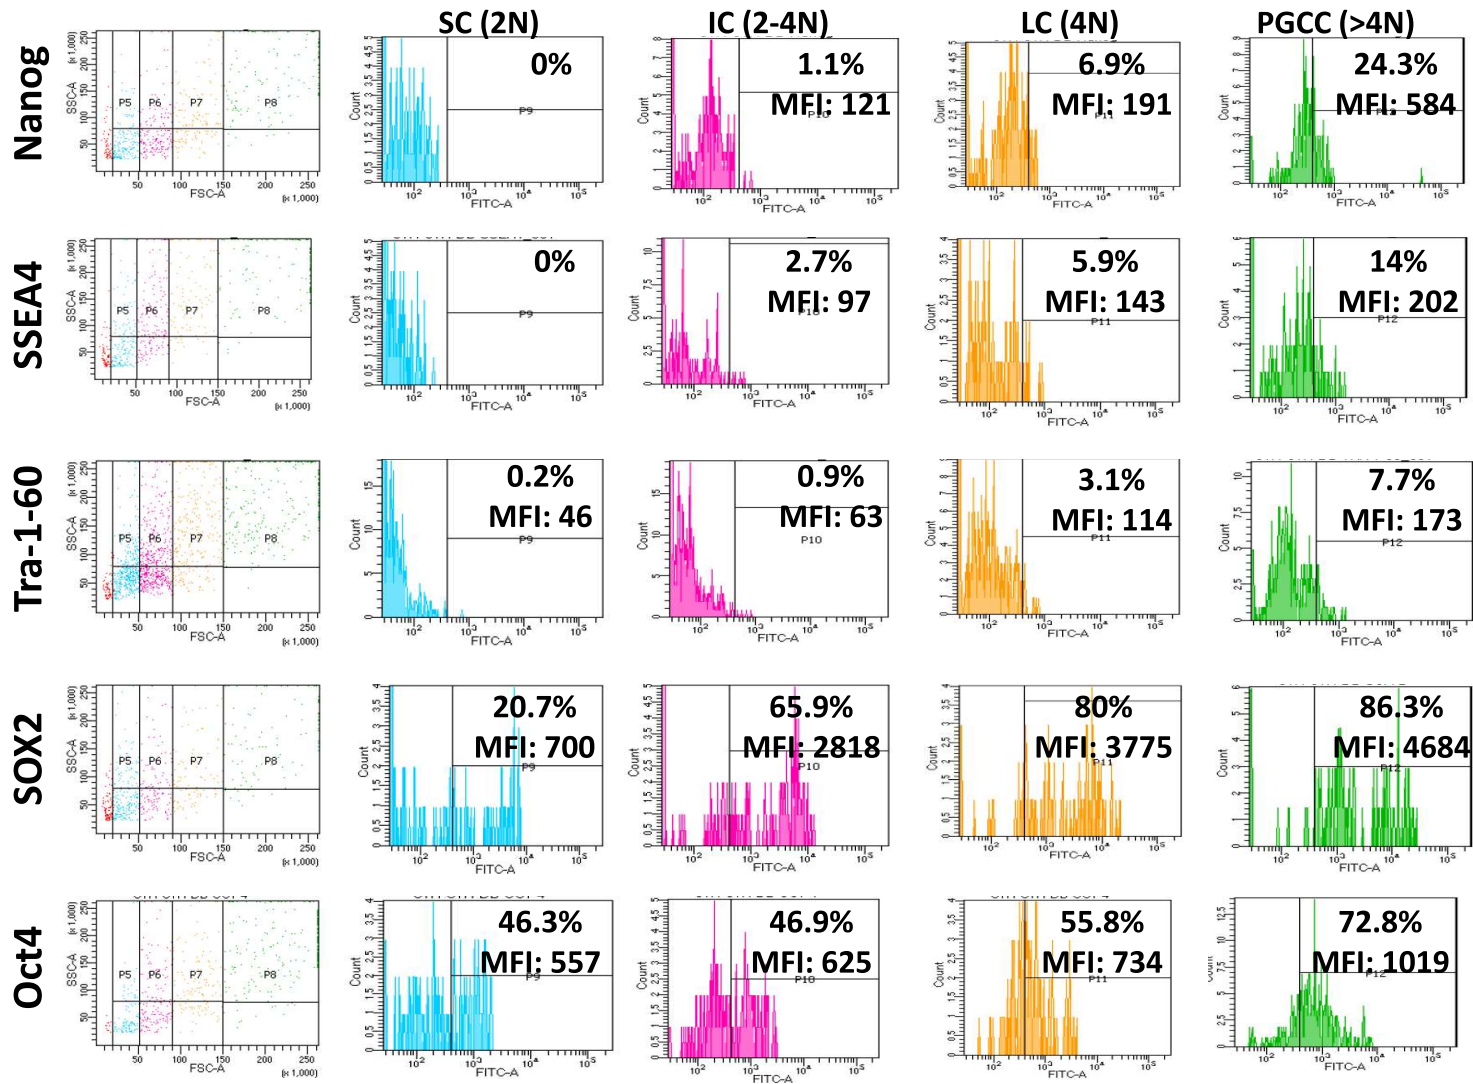

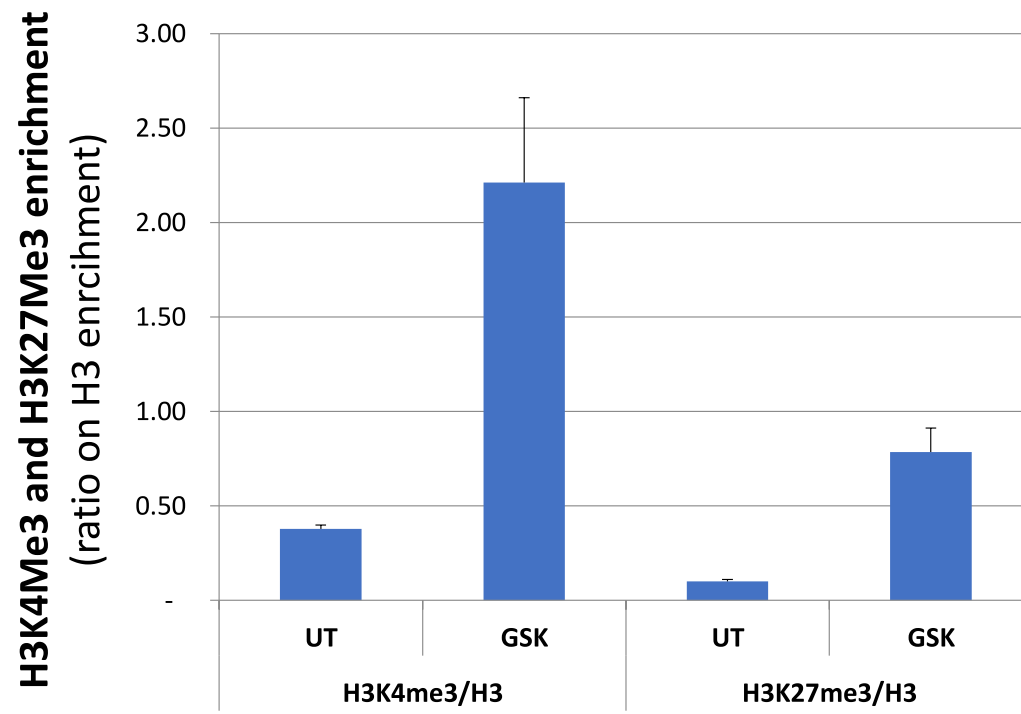

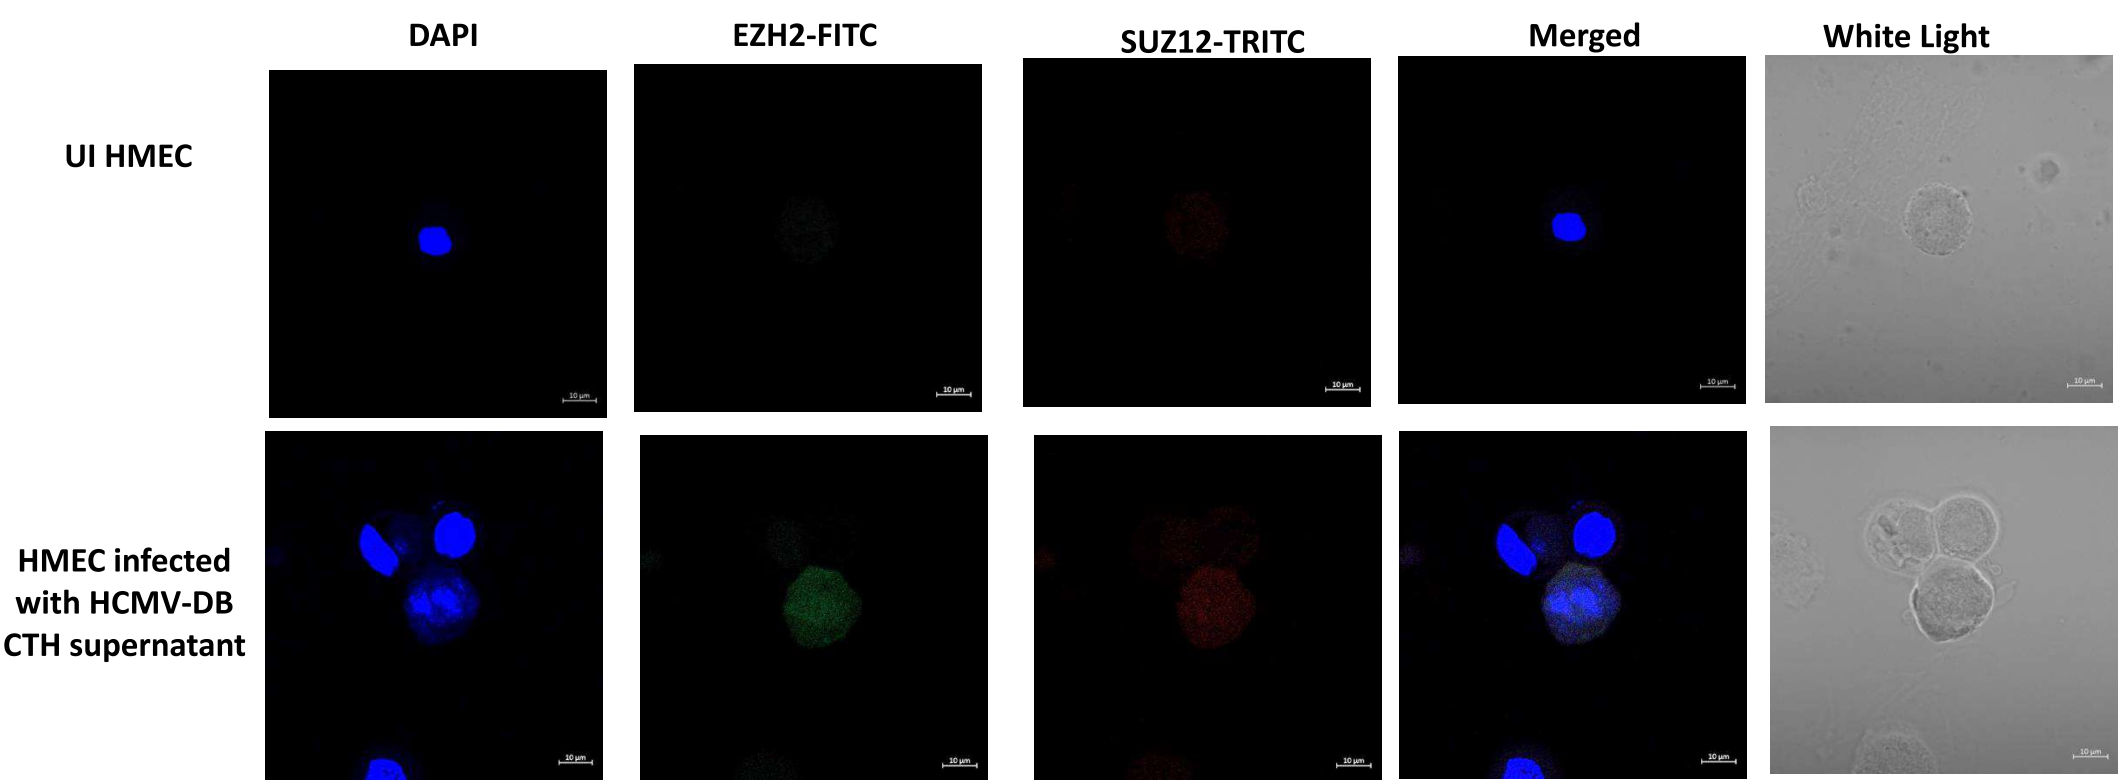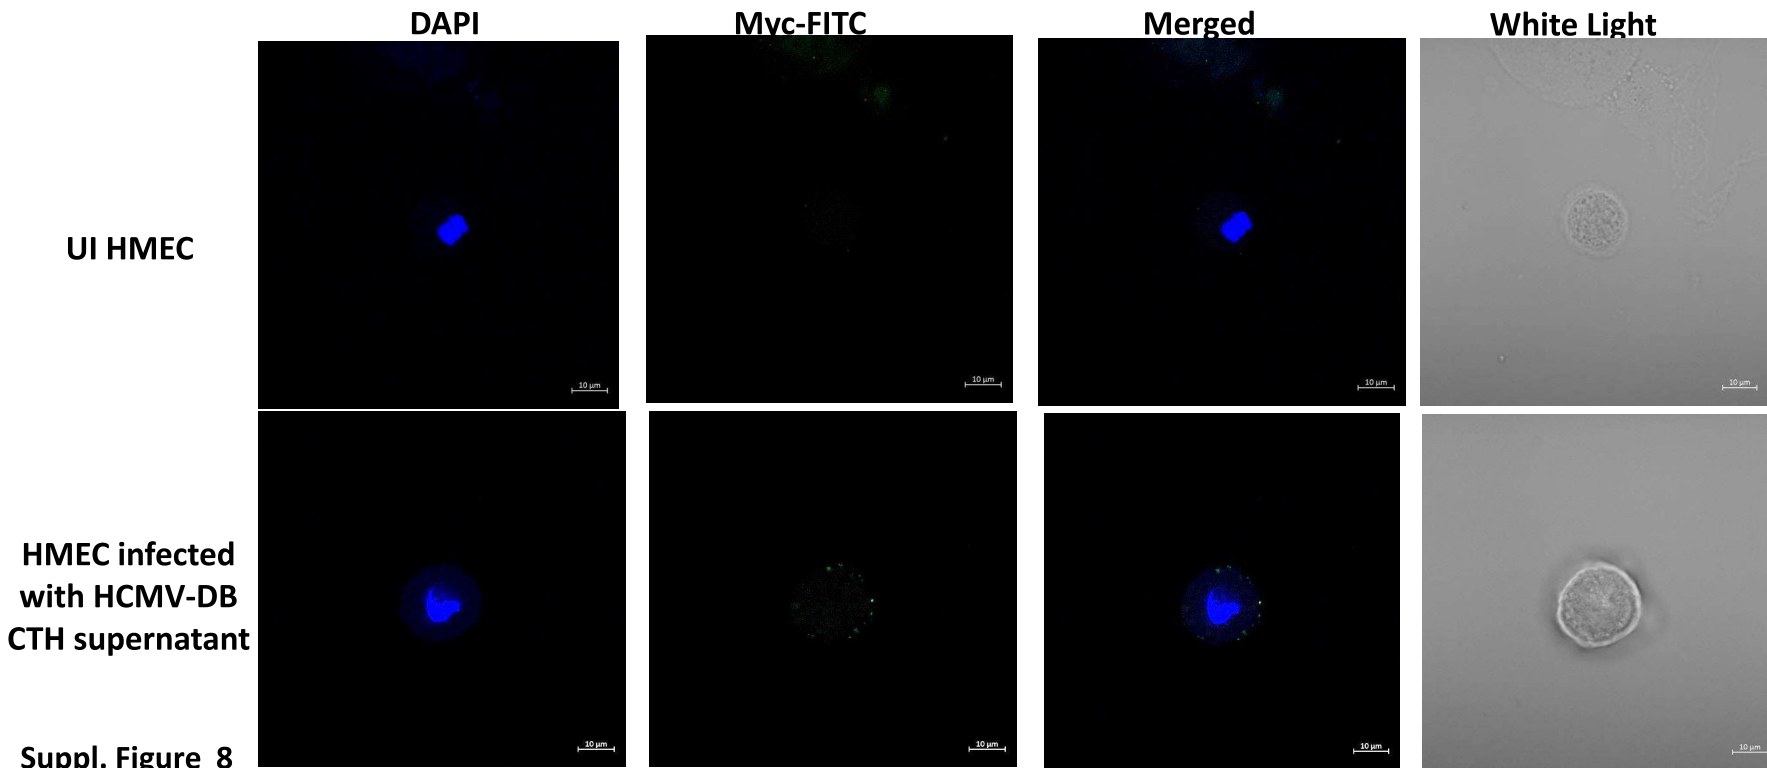

**a**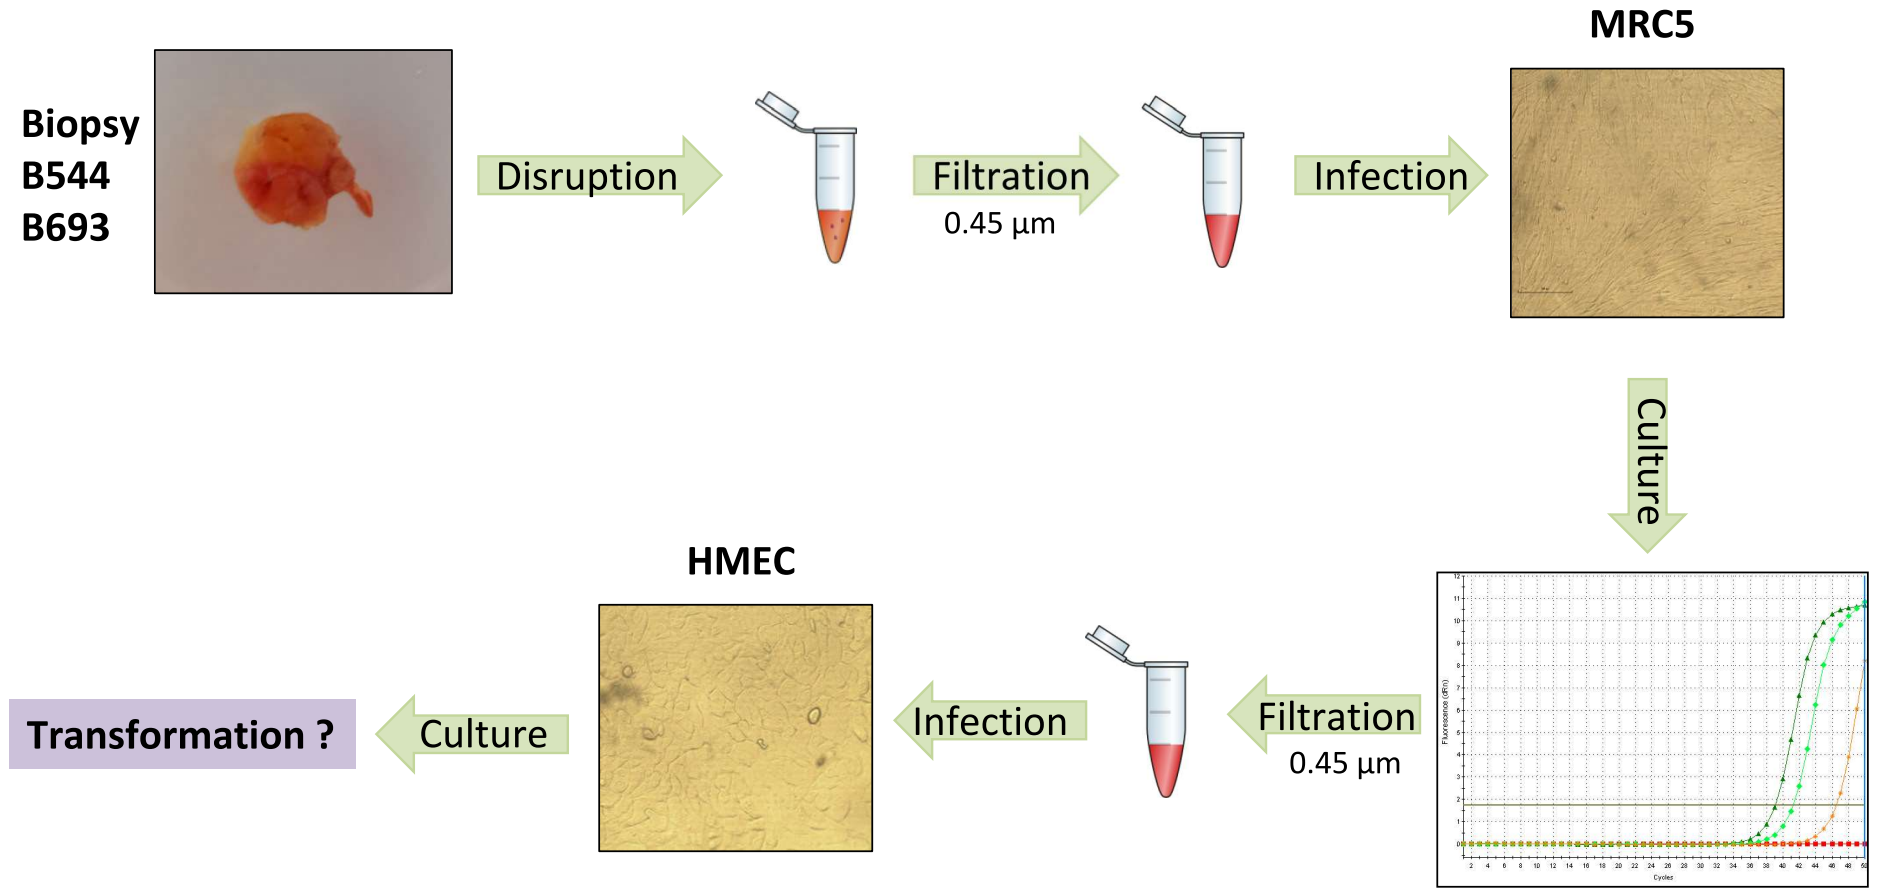**b**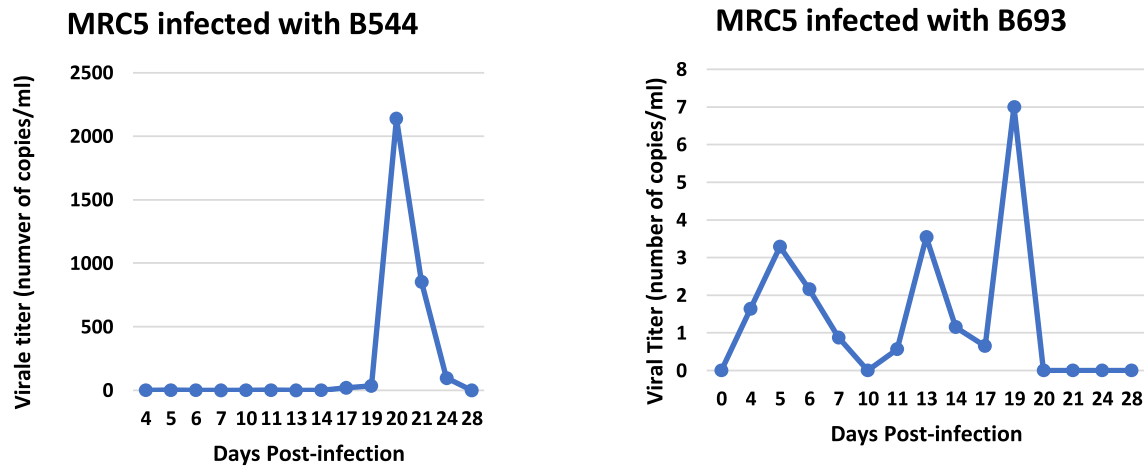

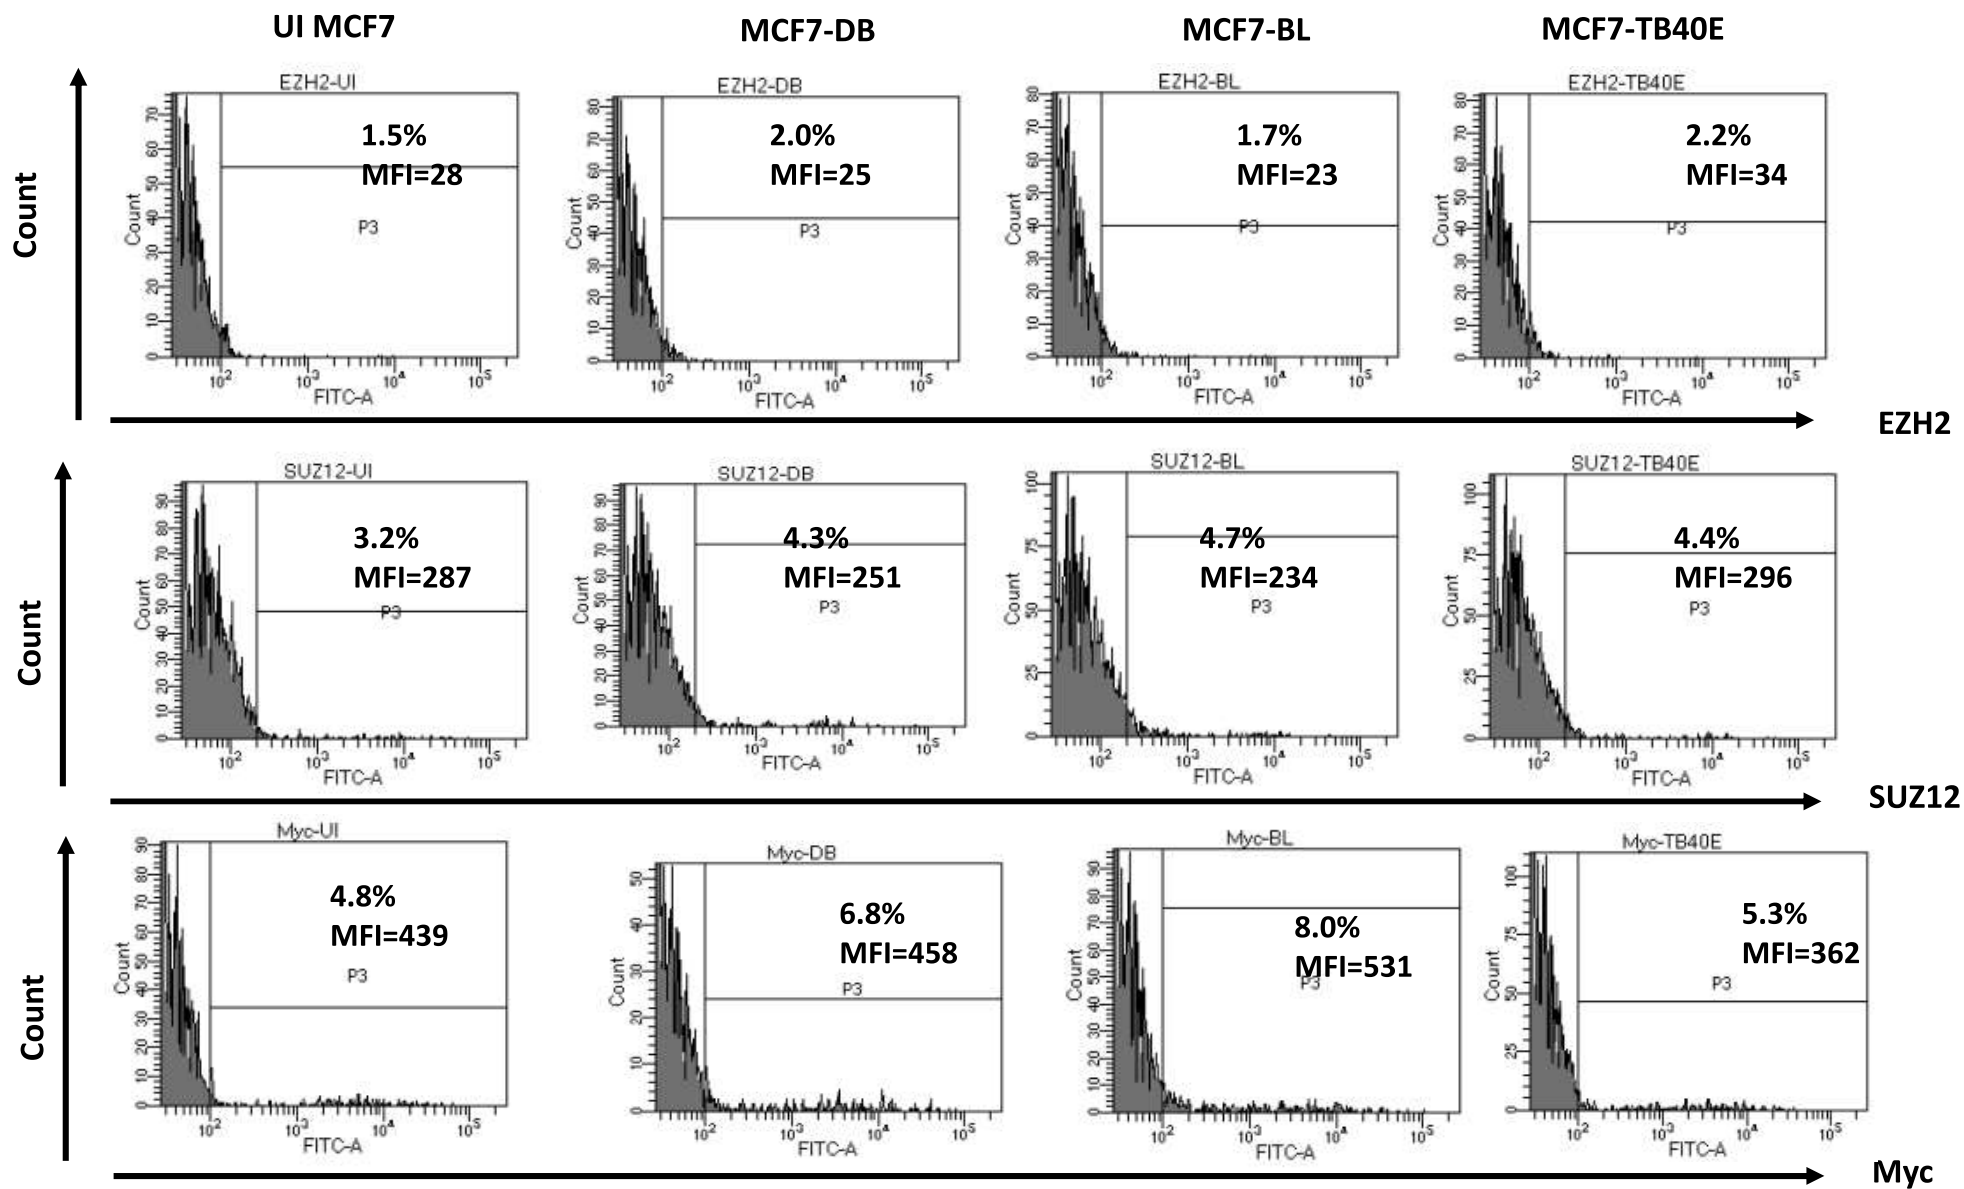

Suppl Figure 10

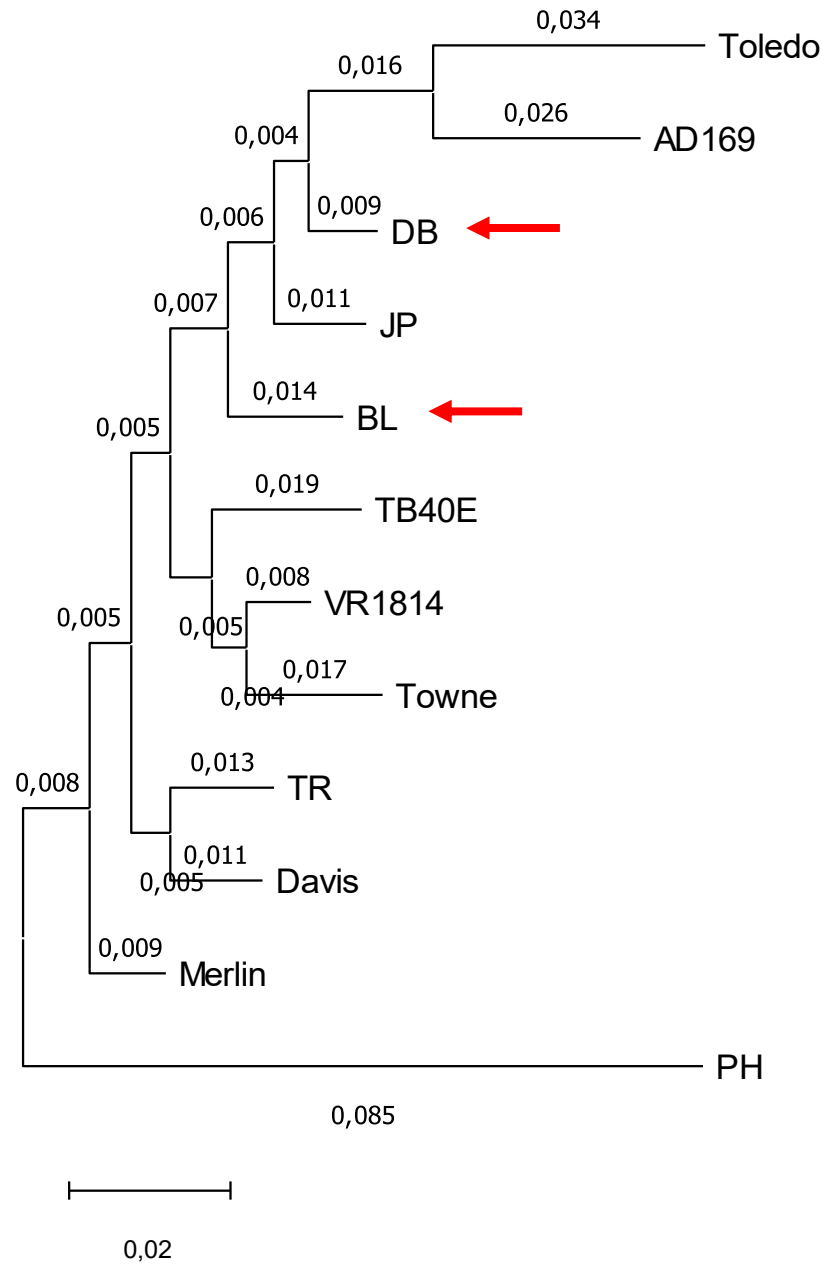

Suppl Figure 11
