# Supplementary material for: Polyploid giant cancer cells, EZH2 and Myc upregulation in mammary epithelial cells infected with high-risk human cytomegalovirus
Source: PubMed Central journal article supplement — eBioMedicine. 2022 May 18;80:104056. doi: 10.1016/j.ebiom.2022.104056 (PMC9121245; doi:10.1016/j.ebiom.2022.104056), 2022-05-18
Supplement: mmc3.pdf [file mmc3.pdf]

**Validation table 1. List of Cell lines used**

| <b>Cell line</b> | <b>Provider</b>                         | <b>RRID</b>  |
|------------------|-----------------------------------------|--------------|
| MDA-MB-231       | Institut Hiscia, Arlesheim, Switzerland | CVCL_0062    |
| MCF-7            | Institut Hiscia, Arlesheim, Switzerland | CVCL_0031    |
| MRC5             | RD Biotech, BESANCON, FRANCE            | CVCL_0440    |
| HMEC             | Life Technologies, Carlsbad, CA, USA    | Cat # A10565 |

**Validation table 2. List of antibodies used**

| <b>Target</b>    | <b>RRID</b>                               |
|------------------|-------------------------------------------|
| EZH2             | AB_2561022                                |
| SUZ12            | AB_2614929                                |
| Myc              | AB_310165                                 |
| pp65             | AB_631358                                 |
| HCMV late Ag     | Cat #11-005, BioMérieux, Craponne, France |
| Oct4             | AB_445175                                 |
| SSEA-4           | AB_778073                                 |
| Nanog            | AB_446437                                 |
| Tra-1-60         | AB_778563                                 |
| SOX2             | AB_2341193                                |
| Ki67 Ag          | AB_396302                                 |
| Akt              | AB_1118808                                |
| pAkt             | AB_560378                                 |
| STAT3            | AB_628293                                 |
| pSTAT3           | AB_397015                                 |
| EpCAM            | AB_400261                                 |
| CD49f            | AB_396078                                 |
| vimentin         | AB_628437                                 |
| E-cadherin       | AB_2076666                                |
| CD24             | AB_395822                                 |
| CD44             | AB_395870                                 |
| Anti-mice FITC   | AB_394862                                 |
| Anti-rabbit FITC | AB_955238                                 |
| Mice IgG PE      | AB_10050483                               |
| H3K27me3         | AB_2616029                                |
| H3K4me3          | AB_306649                                 |
| Total anti-H3    | AB_302613                                 |

**Validation table 3. List of Viral strains used**

| <b>Strain name</b> | <b>Species</b>  | <b>Host species</b> | <b>Initial description</b>         | <b>Genebank reference</b> |
|--------------------|-----------------|---------------------|------------------------------------|---------------------------|
| DB                 | Cytomegalovirus | Human               | DOI: 10.4049/jimmunol.0803800      | KT959235                  |
| BL                 | Cytomegalovirus | Human               | DOI: 10.1038/s41388-021-01715-7    | MW980585                  |
| B544               | Cytomegalovirus | Human               | DOI: 10.3389/fimmu.2021.772160     | NA                        |
| B693               | Cytomegalovirus | Human               | DOI: 10.3389/fimmu.2021.772160     | NA                        |
| TB40E              | Cytomegalovirus | Human               | DOI : 10.1099/0022-1317-80-11-2867 | KF297339                  |

**Results:**

| DNA-System | DNA-criteria<br>HuMEC-2013<br>CL181107_001 |
|------------|--------------------------------------------|
| D3S1358    | 17, 17                                     |
| vWA        | 15, 17                                     |
| D16S539    | 12, 13                                     |
| CSF1PO     | 11, 13                                     |
| TPOX       | 8, 9                                       |
| AM         | X, X                                       |
| D8S1179    | 13, 14                                     |
| D21S11     | 28, 31                                     |
| D18S51     | 14, 15                                     |
| D2S441     | 13, 14                                     |
| D19S433    | 13, 15                                     |
| TH01       | 9, 9.3                                     |
| FGA        | 22, 23                                     |
| D22S1045   | 15, 15                                     |
| D5S818     | 8, 10                                      |
| D13S317    | 9, 12                                      |
| D7S820     | 9, 11                                      |
| SE33       | 18, 21                                     |
| D10S1248   | 12, 15                                     |
| D1S1656    | 13, 14                                     |
| D12S391    | 21, 23                                     |
| D2S1338    | 19, 25                                     |

**Summary:**

The following table shows the result of the comparison with the online database of the DSMZ (<http://www.dsmz.de/de/service/services-human-and-animal-cell>) and the Cellosaurus database (<https://web.expasy.org/cellosaurus/>):

| <u>Our sample number</u> | <u>Client sample name</u> | <u>Database name</u>           |
|--------------------------|---------------------------|--------------------------------|
| CL181107_001             | HuMEC-2013                | Profile not found in databases |

The samples HuMEC-2017, CTH-P50 and HuMEC-SP did not contain sufficient human DNA for a STR profile.



Dr. Burkhard Rolf  
Director Forensic Services



Dr. Michaela Bosch  
Project Manager DNA-Forensics

Eurofins Medigenomix Forensik GmbH carries out all analyses with greatest care and on the basis of state of the art scientific knowledge. All results solely refer to the analysed samples. Our expert's reports must not be duplicated in extracts without consent of Eurofins Medigenomix Forensik GmbH.  
Cell\_line-certificate\_eng\_V05\_21032017

Vorlage\_Verwandschaftsanalyse\_EUROFINS\_v02\_121127

**Results:**

| DNA-System | DNA-criteria<br>MDA-MB-231<br>CL181018_003 | DNA-criteria<br>MCF-7<br>CL181018_004 |
|------------|--------------------------------------------|---------------------------------------|
| AM         | X, X                                       | X, X                                  |
| D3S1358    | 16, 16                                     | 16, 16                                |
| D1S1656    | 15, 17                                     | 11, 15.3                              |
| D6S1043    | 18, 18                                     | 12, 18                                |
| D13S317    | 13, 13                                     | 11, 11                                |
| Penta E    | 11, 11                                     | 7, 12                                 |
| D16S539    | 12, 12                                     | 11, 12                                |
| D18S51     | 11, 16                                     | 14, 14                                |
| D2S1338    | 20, 21                                     | 21, 23                                |
| CSF1PO     | 12, 13                                     | 10, 10                                |
| Penta D    | 11, 14                                     | 12, 12                                |
| TH01       | 7, 9.3                                     | 6, 6                                  |
| vWA        | 15, 18                                     | 14, 15                                |
| D21S11     | 30, 33.2                                   | 30, 30                                |
| D7S820     | 8, 9                                       | 8, 9                                  |
| D5S818     | 12, 12                                     | 11, 12                                |
| TPOX       | 8, 9                                       | 9, 12                                 |
| D8S1179    | 13, 13                                     | 10, 14                                |
| D12S391    | 17, 18                                     | 18, 20                                |
| D19S433    | 11, 14                                     | 13, 14                                |
| FGA        | 22, 23                                     | 23, 25                                |

**Summary:**

The following table shows the result of the comparison with the online database of the DSMZ (<http://www.dsmz.de/de/service/services-human-and-animal-cell>):

| <u>Our sample number</u> | <u>Client sample name</u> | <u>DSMZ name</u> |
|--------------------------|---------------------------|------------------|
| CL181018_003             | MDA-MB-231                | MDA-MB-231       |
| CL181018_004             | MCF-7                     | MCF7             |



Dr. Burkhard Rolf  
Director Forensic Services



Dr. Michaela Bosch  
Project Manager DNA-Forensics

Eurofins Medigenomix Forensik GmbH carries out all analyses with greatest care and on the basis of state of the art scientific knowledge. All results solely refer to the analysed samples. Our expert's reports must not be duplicated in extracts without consent of Eurofins Medigenomix Forensik GmbH.  
Cell\_line-certificate\_eng\_V05\_21032017

Vollge\_Versandbescheinigung\_EUROFINS\_v02\_121 127

## Analysis Report for Cell Line Typing

### 1. Sponsor

Mr. Sébastien Pasquereau  
UFR Université de Franche-Comté  
Département Virologie  
EA4266 Pathogenes and Inflammation  
16 Route de Gray  
25030 Besançon Cedex

### 2. Analysis Report

**Report ID:** 00999\_005727  
**Report Version:** 01  
**Issue Date:** 24.06.2020  
**Report Approved:** Joy Beyer

### 3. Descriptions

**Customer Test Item ID:** CTH-DB-2020-2  
**Analysis Method:** Profiling of the human cell lines was done using highly polymorphic short tandem repeat loci (STRs). STR loci were amplified using the PowerPlex® 16 HS System (Promega). Fragment analysis was done on an ABI3730xl (Life Technologies) and the resulting data were analyzed with GeneMarker HID software (Softgenetics).

### 4. Analysis Results

#### 4.1. Summary Table of the STR Profile

| Locus   | Chromosomal Location | Core STR Marker | Customer Sample Typed Alleles | Database Alleles | Comments |
|---------|----------------------|-----------------|-------------------------------|------------------|----------|
| D3S1358 | Chr03                |                 | 16/17                         | N/A              |          |
| TH01    | Chr11                | Yes             | 9                             | N/A              |          |
| D21S11  | Chr21                |                 | 28/32.2                       | N/A              |          |
| D18S51  | Chr18                |                 | 14                            | N/A              |          |
| Penta_E | Chr15                |                 | 7/11                          | N/A              |          |
| D5S818  | Chr05                | Yes             | 9/12                          | N/A              |          |
| D13S317 | Chr13                | Yes             | 11/12                         | N/A              |          |
| D7S820  | Chr07                | Yes             | 9/10                          | N/A              |          |
| D16S539 | Chr16                | Yes             | 11/12                         | N/A              |          |
| CSF1PO  | Chr05                | Yes             | 10/13                         | N/A              |          |
| Penta_D | Chr21                |                 | 13                            | N/A              |          |
| AMEL    | X/Y                  | Yes             | X                             | N/A              |          |
| vWA     | Chr12                | Yes             | 15/17                         | N/A              |          |
| D8S1179 | Chr08                |                 | 14/15                         | N/A              |          |
| TPOX    | Chr2                 | Yes             | 8/11                          | N/A              |          |
| FGA     | Chr04                |                 | 22/25                         | N/A              |          |

## 4.2. Electropherogram

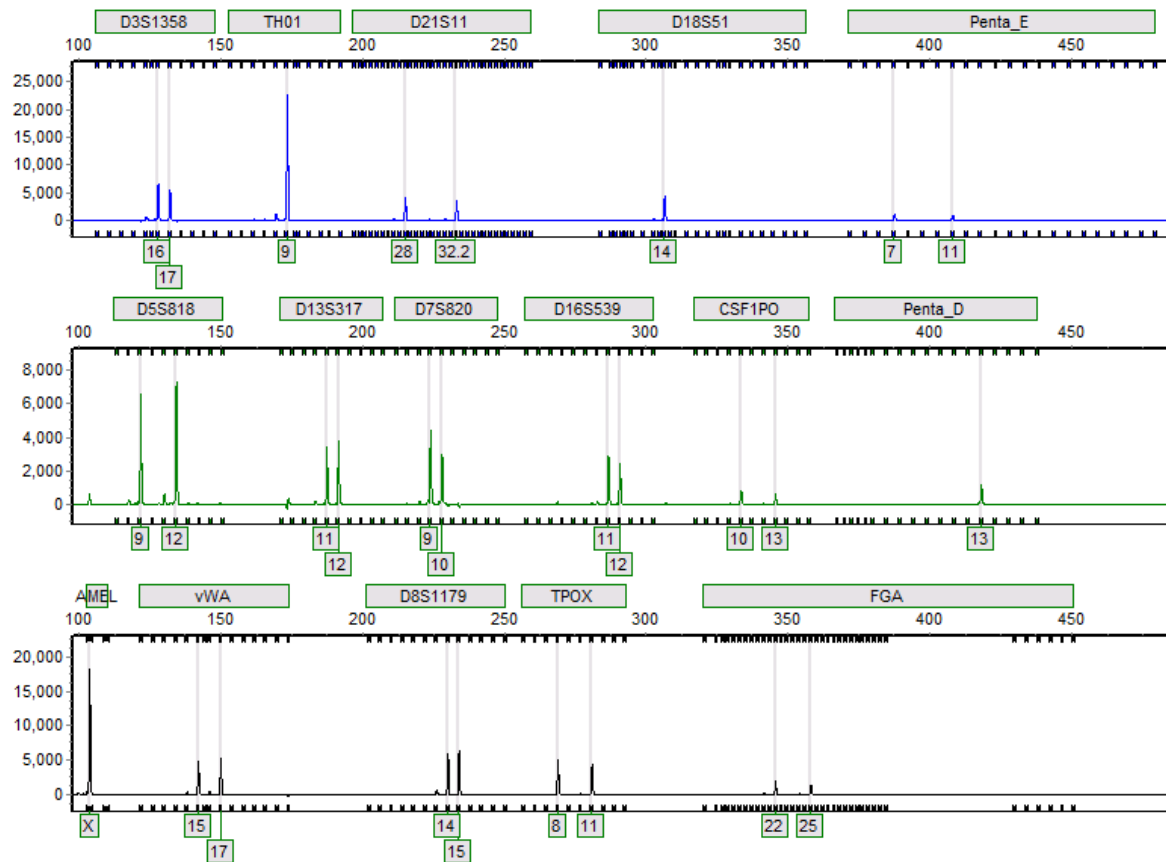

## 5. Conclusion

According to our analysis of the submitted sample there is no detectable contamination with human origin.

A search with the analyzed data of the submitted sample in the Microsynth, Cellosaurus, ATCC and DSMZ databases didn't give any useful match with a reference DNA profile.

## 6. Customer Comment

Samples can be pooled

## **7. Glossary**

### Short Tandem Repeats (STRs)

Short tandem repeats (STRs) consists of a DNA motif of 2-13 bases that are repeated up to several hundred times. The number of repeats in a STR is highly variable among individuals, resulting in fragment length differences if amplified using PCR. These differences in fragment lengths at different loci are used for profiling the cell lines.

### Stutter Peaks

Stutter peaks are small peaks which occur immediately before or after the true peak. Stutter peaks are commonly caused by a slippage of the polymerase during the PCR amplification.

### Detection of Cell Line Mixtures

Contamination of one cell line by one or several other cell lines can be detected down to a frequency of the contaminating cell line of 3%. Typically, cell line mixtures will result in STR profiles including three or more peaks for single or multiple loci. If Microsynth notices a possible contamination of a cell line, we will comment the finding in the conclusion part of the analysis.

### Peak height ratio

Peak height ratio < 25 % (to the highest peak within a STR) is mentioned in the summary table (comments). Peak height ratios < 25% need not necessarily have an effect on the behaviour or characteristics of the cell line. A small peak height may be due to reduced amplification efficiency, for example resulting from a mutation in the primer site. The reason for the difference in peak heights observed, however, would need some in depth analysis of the test item.

## **8. General Comment**

The results refer only to the portion of the sample Microsynth has analyzed. The analysis results might not be assigned unconditionally to the whole sample. Microsynth shall not in any event be liable for incidental, consequential or special damages in relation to carried out analyses and corresponding results.

This report is the confidential property of the client addressed. The report may only be reproduced in full. Publication of extracts from this report is not permitted without written approval from Microsynth.

## **9. Compliance and Quality Assurance Statement**

All aspects of this study were in accordance with ISO 9001:2015 standards. All the applied equipment is qualified and calibrated. The applied methods are validated.
