# Supplementary material for: Polyploid giant cancer cells, EZH2 and Myc upregulation in mammary epithelial cells infected with high-risk human cytomegalovirus
Source: PubMed Central journal article supplement — eBioMedicine. 2022 May 18;80:104056. doi: 10.1016/j.ebiom.2022.104056 (PMC9121245; doi:10.1016/j.ebiom.2022.104056), 2022-05-18

# SUZ12 and $\beta$ -Actin WB

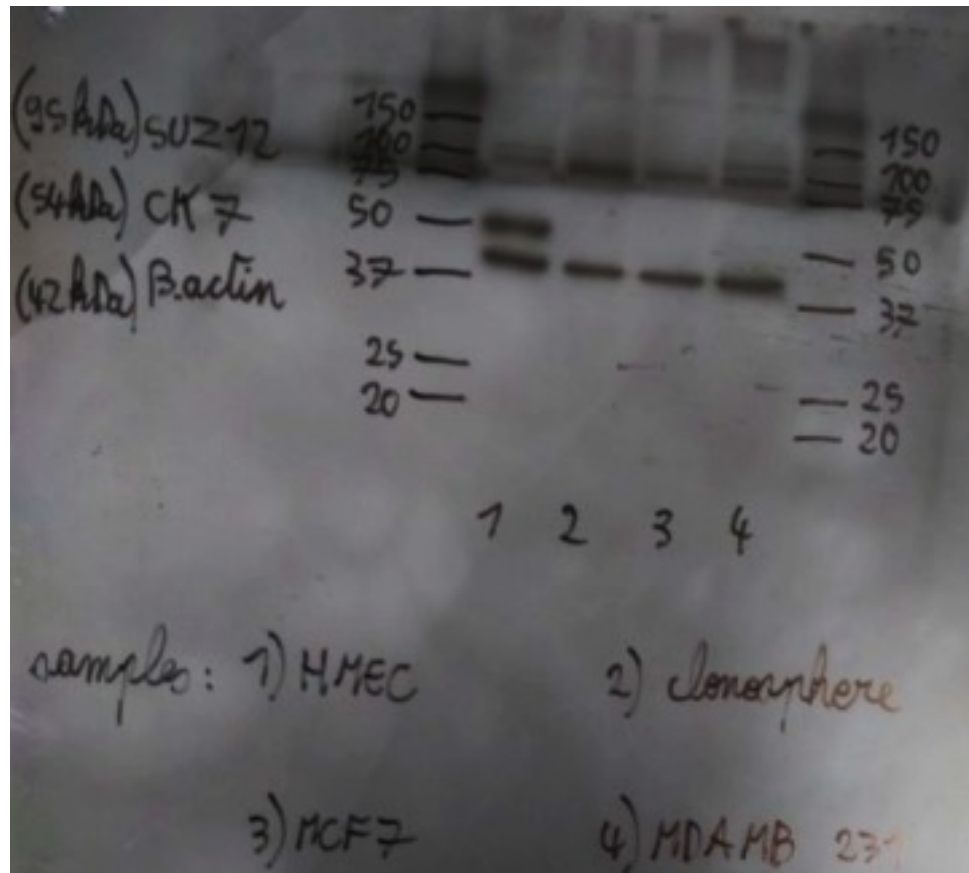

# EZH2 WB

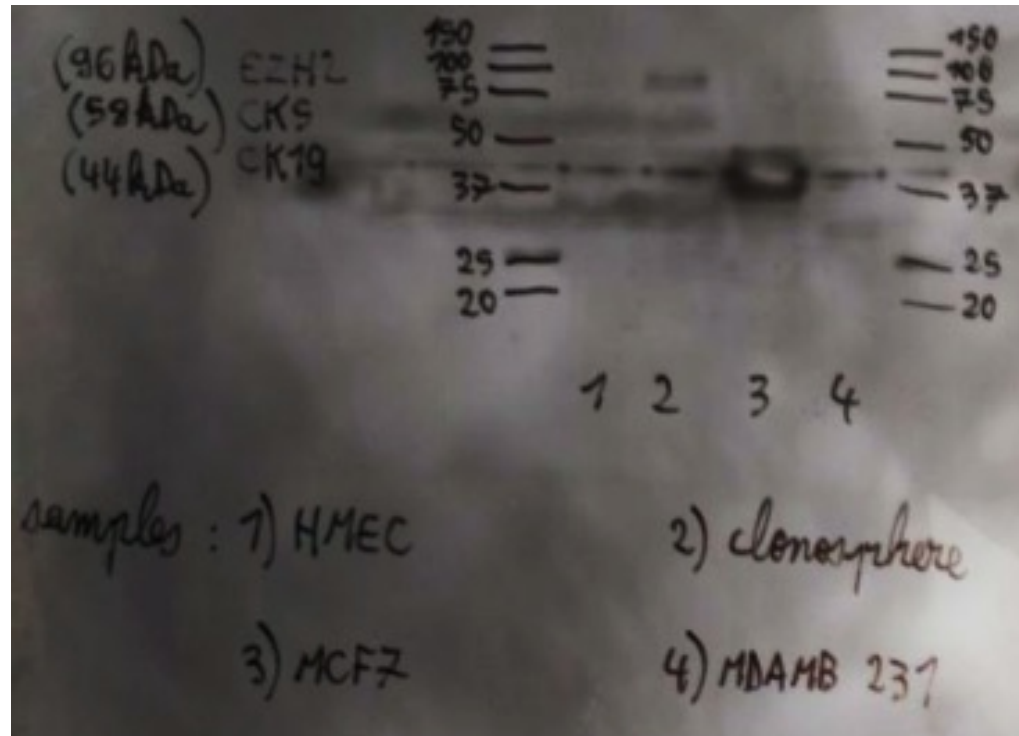

# Myc WB

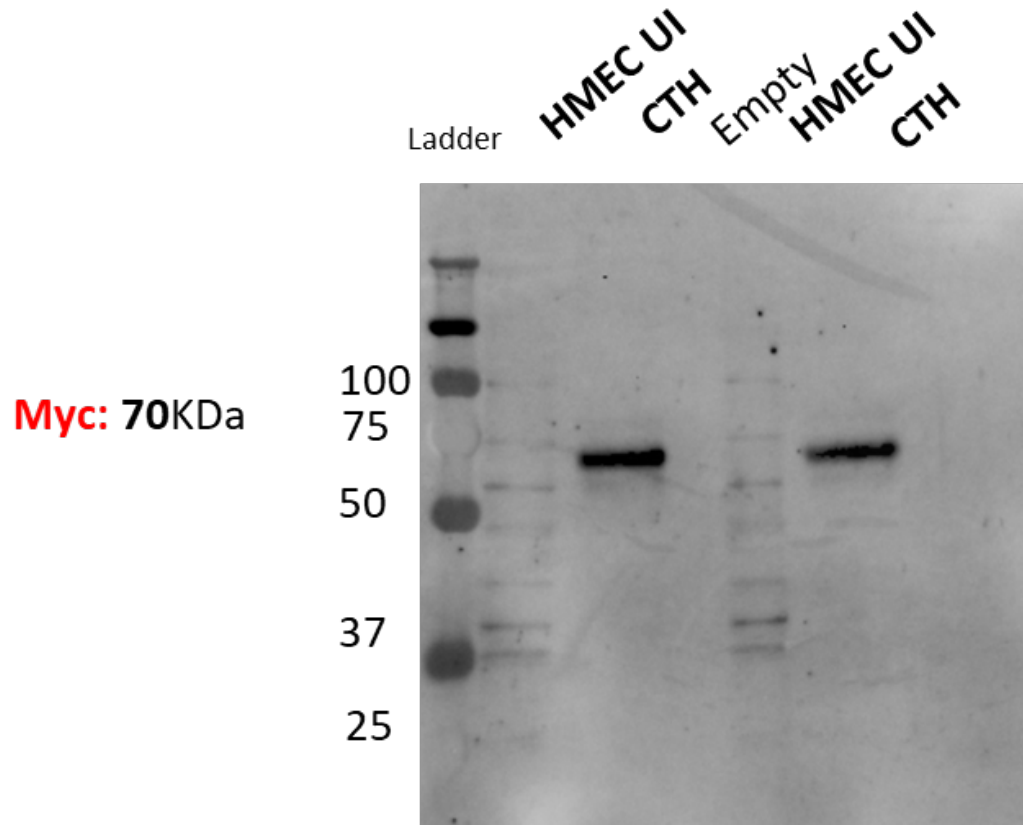

# $\beta$ -actin WB

**b-Actin: 42 kDa**

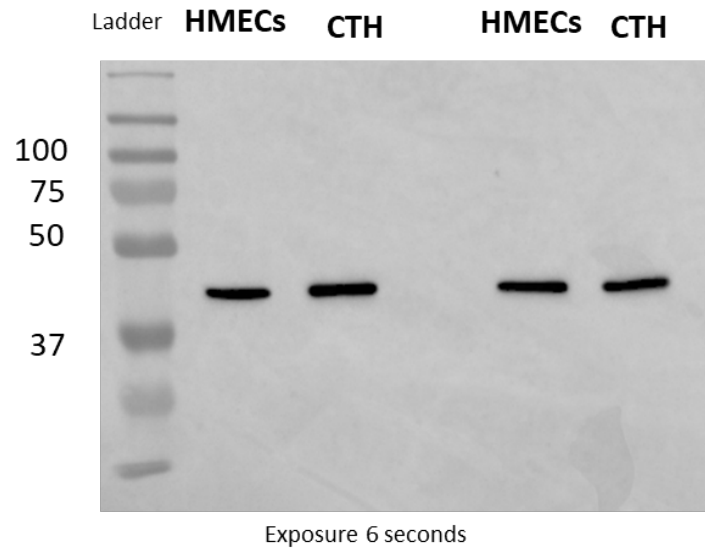

# Oct4 RT-PCR

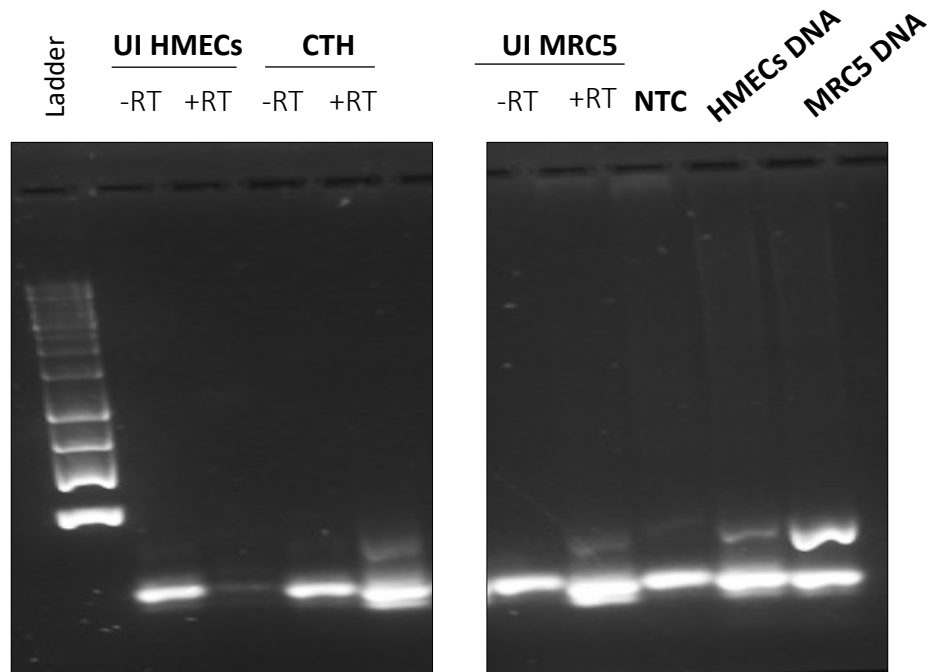





# Podocalyxin (Tra-1-60) RT-PCR

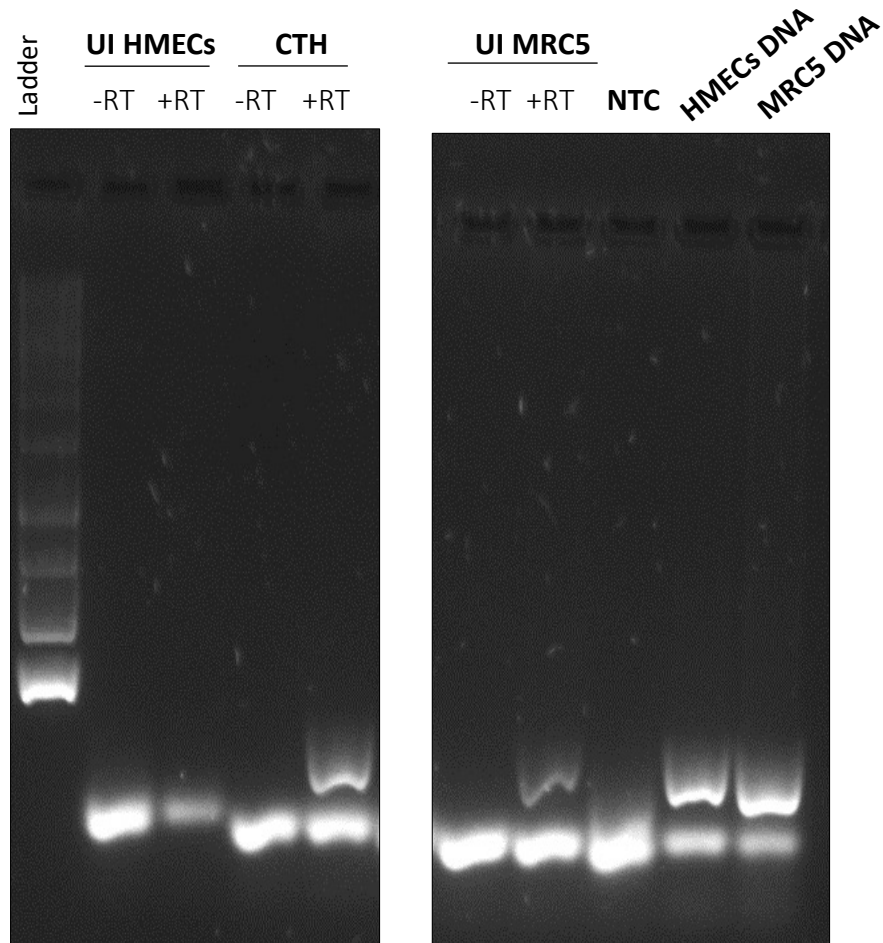



# SOX2 RT-PCR

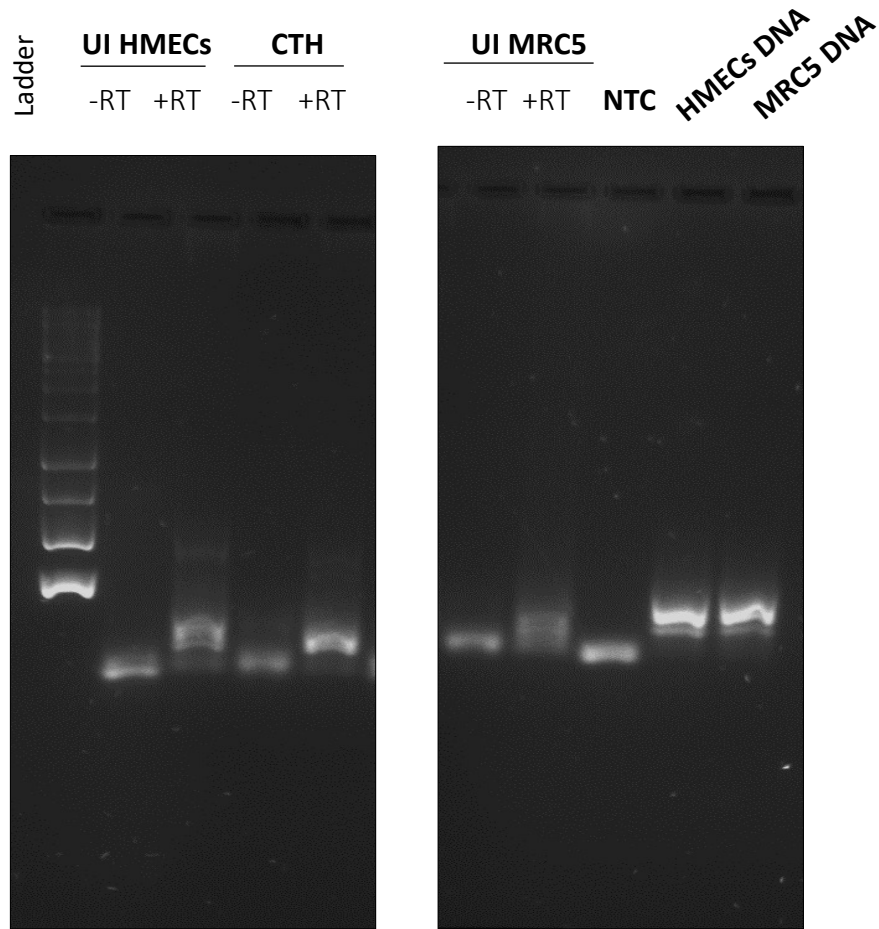

# $\beta$ -globin RT-PCR

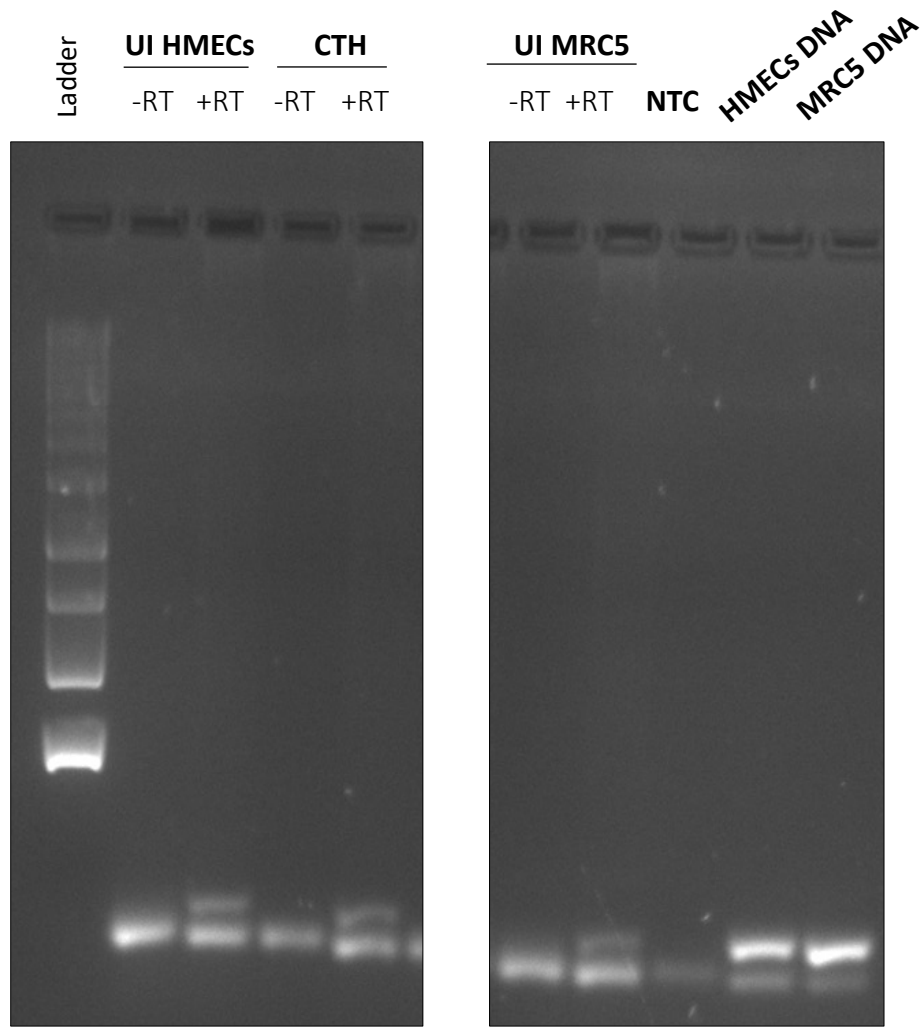

# RNA IP RNA4.9 using EZH2 antibody

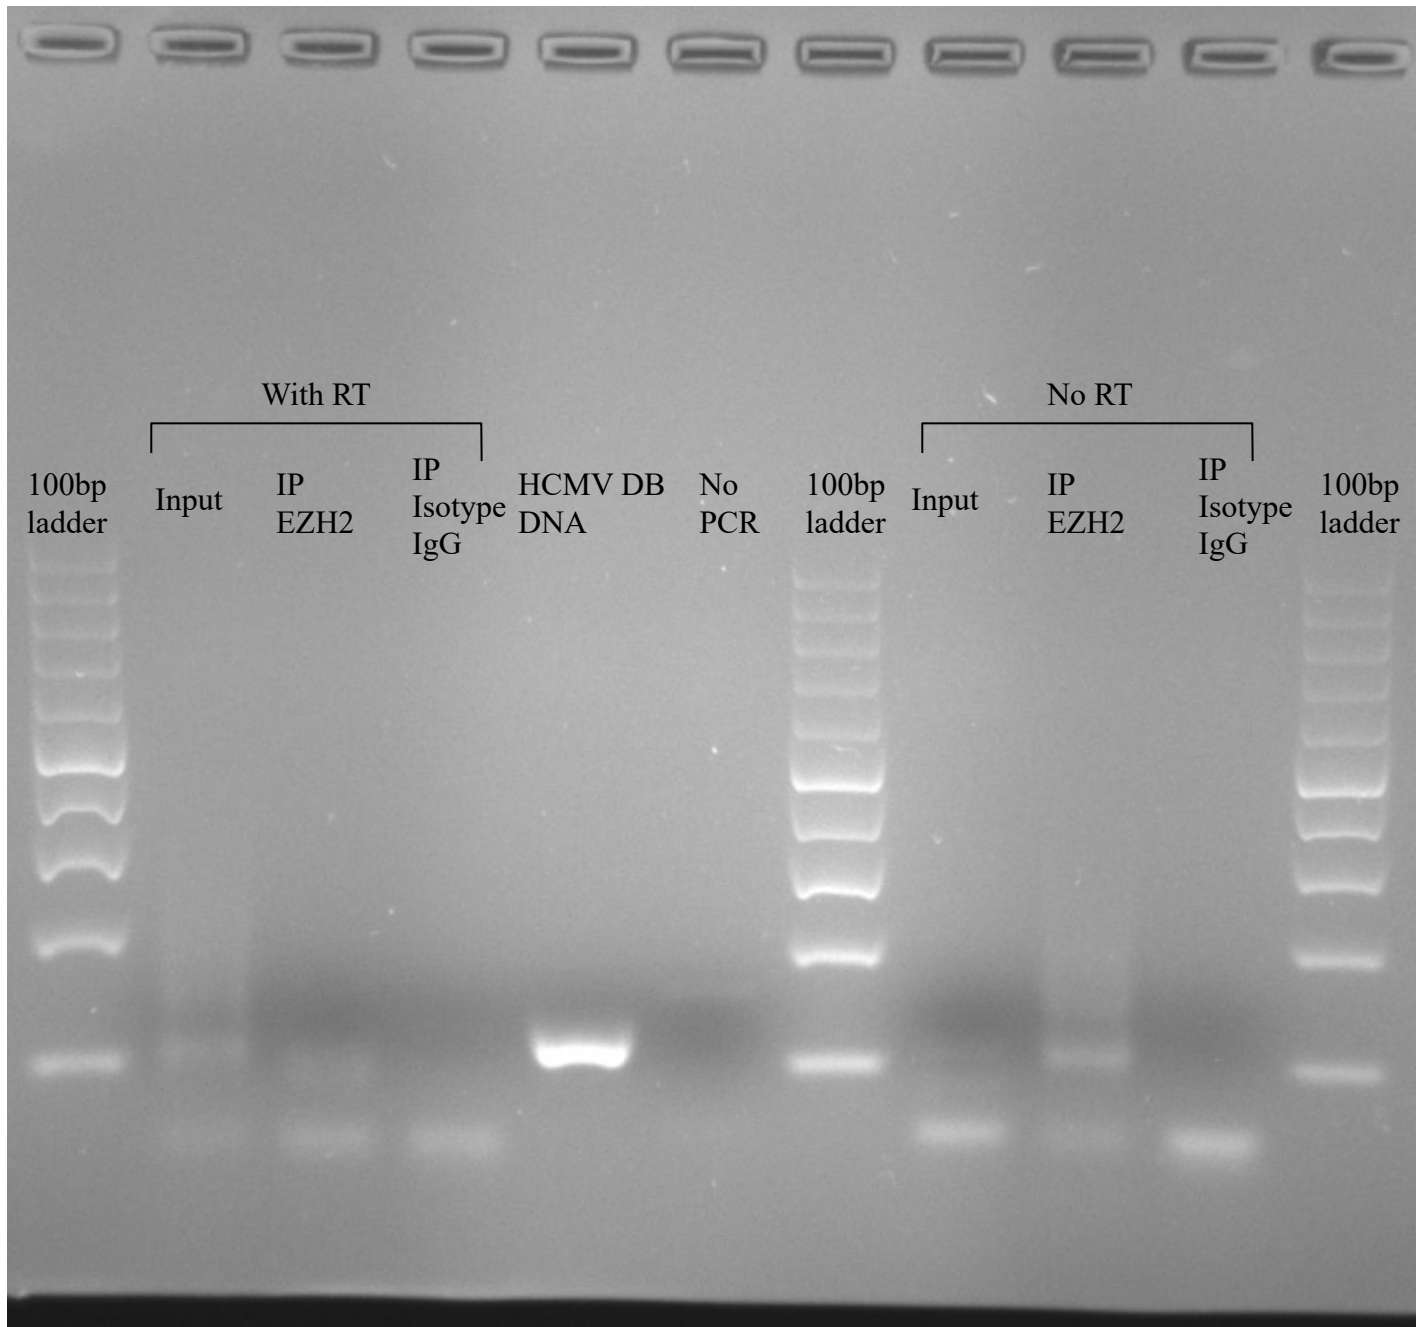

# RNA4.9 PCR

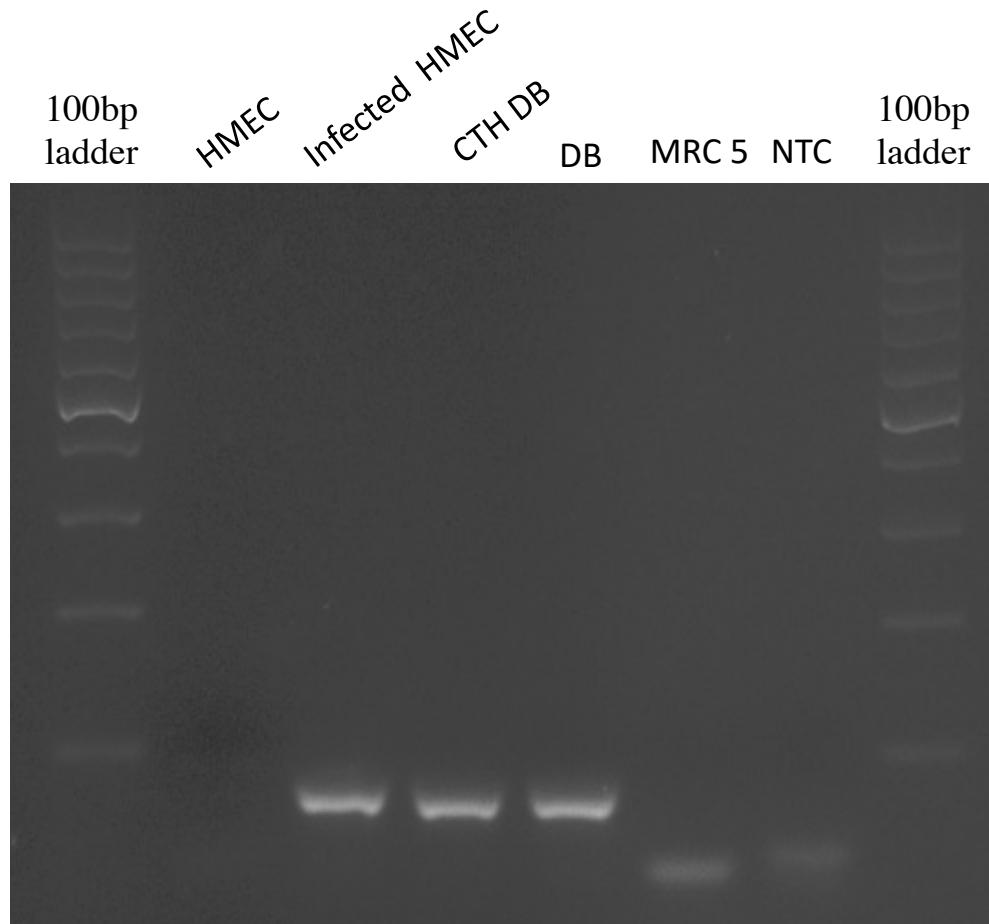

Supplement: mmc4.pdf [file mmc4.pdf]
